# Supplementary material
Source: PubMed Central journal article supplement (PMC2650355)
Supplement: 0810558106_0810558106SI.pdf [file 0810558106_0810558106SI.pdf]

# Supporting Information

Kwok *et al.* 10.1073/pnas.0810558106

## SI Text

### Methods

**Gel Filtration Assay.** Gel filtration assay was performed as described (1, 2). Briefly, cell lysates harvested from 293 cells transiently transfected with  $\Delta E$  constructs were subjected to gel filtration analysis using a  $\ddot{A}$ KTA<sub>FPLC</sub> system with Superdex 200 gel filtration column (1.6  $\times$  60 cm; Amersham Pharmacia) preequilibrated with running buffer [0.05 M Tris-Cl (pH 7.6), 200 mM NaCl, 3 mM EDTA, and 0.2 mM PMSF] at a flow rate of 0.5 mL/min. Collected fractions were analyzed by Western blot using either M2 anti-Flag antibody (Sigma-Aldrich) or anti-myc (A-14) antibody (Santa Cruz Biotechnology).

**Quantitative RT-PCR (Q-RT-PCR).** The following primers have been used for Q-RT-PCR:

mCBF $\beta$  forward primer 5' GGTTGCCTGGAGTTTGATGAG 3'

mCBF $\beta$  reverse primer 5' GAGTTCTTCTTCGAGCCTCTTCA 3' mCBF $\beta$  Taqman probe 5' FAM-CCCAGCAGGAA-GATGCATTAGCACAAC-TAMRA 3'

Primer/probe combination against mGAPDH was obtained from Applied Biosystems.

1. Kwok C, Zeisig BB, Dong S, So CW (2006) Forced homo-oligomerization of RARalpha leads to transformation of primary hematopoietic cells. *Cancer Cell* 9:95–108.

2. Zeisig BB, *et al.* (2007) Recruitment of RXR by homotetrameric RARalpha fusion proteins is essential for transformation. *Cancer Cell* 12:36–51.

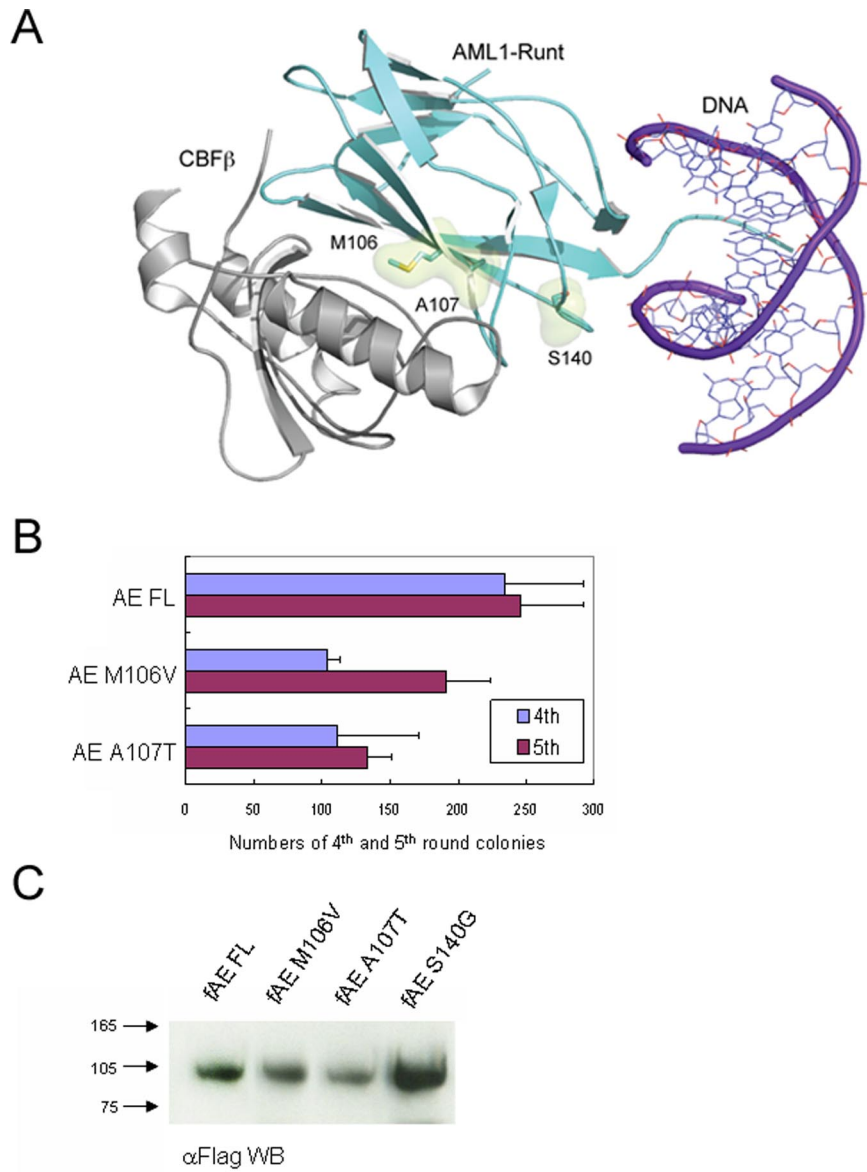

**Fig. S1.** Characterization of CBF $\beta$  interaction-deficient AE point mutants with enhanced self-renewal property. (A) Schematic representation of the complex between CBF $\beta$  (gray), the Runt domain of AML1 (cyan), and DNA (purple) based on PDB accession 1H9D. The residues M106, A107, and S140 are shown in stick representation. (B) Numbers of forth- and fifth-round colonies of primary bone marrow cells transduced by AE and the indicated point mutant constructs. (C) Western blot of 293 cell lysates transfected with indicated constructs using  $\alpha$ -Flag antibody.

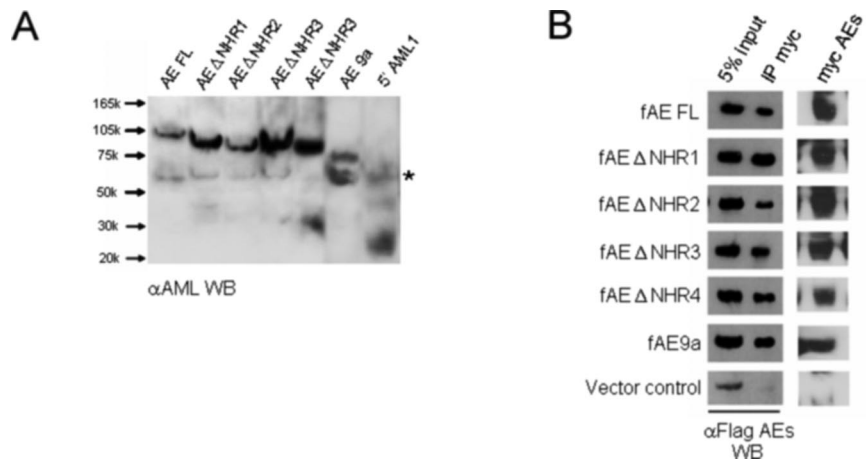

**Fig. S2.** Expression and dimerization properties of AE deletion mutants. (A) Western blot of 293 cell lysates transfected with indicated constructs using  $\alpha$ -AML1 antibody. Asterisk indicates endogenous AML1 protein. (B) Coimmunoprecipitation assay between Flag-tagged and myc-tagged versions of AE constructs.
